# Supplementary material for: Brain Network Organization Correlates with Autistic Features in Preschoolers with Autism Spectrum Disorders and in Their Fathers: Preliminary Data from a DWI Analysis
Source: PubMed Central journal article supplement (PMC6518033; doi:10.3390/jcm8040487), 2019-04-10
Supplement: jcm-08-00487-s001.pdf [file jcm-08-00487-s001.pdf]

## S1. Nodal measures correlations in fathers and in their children

### Children

**EL index.** ADOS-CSS was significantly positively correlated with EL of bilateral PCL, left CNGpost and right STG. SA was also positively correlated with the left CAU, moreover it was also positively correlated with bilateral HIP and right IPC. RRB was significantly negatively correlated with left HIP and right IPC. A significant positive correlation was found between GMDS and the EL of the left CAU. Age also showed a significant negative correlation with EL of left CAU and of right STG.

**CC index.** For CC, significant correlations in most of the same areas were found. ADOS-CSS was positively correlated with CC of CNGpost. About ADOS subdomains, SA was positively correlated with several brain regions: left CAU, bilateral HIP, right FPO, right IPC and right ITG. RRB was correlated with CC of bilateral HIP. GMDS was positively correlated with left CAU, right ITG and right HIP.

**BC index.** ADOS-CSS was significantly positively correlated with the BC of the left IPC and right PCG, and negatively correlated with the BC of the left LOC. SA was significantly positively correlated with the BC of bilateral MFGcaud, left FFG, left LOC and the left CNGpost, and significantly negatively correlated with the BC of the left AMY and right PCG. RRB was negatively correlated with the BC of the left MFGcaud, left FFG, of the CNGpost, and positively correlated with left PCG. GMDS was negatively correlated with the BC of the left FFG and of left LOC.

Age showed a significant positive correlation with BC of the left FFG, left LOC, and a negative correlation with left AMY.

Table s1, left column, summarizes the significant correlations between ASD symptoms and brain network measures in ASD probands.

### Fathers

**EL index.** No significant correlation between EL and total AQ were found. Conversely, the following significant correlations were observed.

The “attention switching” area of the AQ was negatively correlated with the EL of several brain regions: bilateral SFG, bilateral MFGrostr, left IFGoperc, left ORBlat, bilateral POG, left LOC, bilateral CNGisthm, right SMG, right PCN, right STG, right CUN and right INS. In addition, the “attention to details” of the AQ was significantly positive correlated with the EL of left IFGorbit while the “communication” area of AQ was positively correlated with right SFG.

**CC index.** Also for the CC the “attention switching” area of the AQ was negatively correlated with several brain regions: bilateral SFG, bilateral MFGrostr, left IFGoperc, left FPO FPO, left ORBlat, left POG, left LOC (, bilateral CNGisthm, right SMG, right PCN, right STG, right ITG, right CUN and right INS. Moreover the “communication” area of AQ was significantly positively correlated with the CC of right SFG and the “imagination” area of AQ was significantly negatively correlated with the CC of right ACC. Age significantly negatively correlated with the CC of right ACC.

**BC index.** Regarding the BC, a significant negative correlation was found between the “social skills” area of the AQ and the BC of both the left POG and bilateral INS, whereas a significant positive correlation between the “social skills” area of the AQ and the BC of the bilateral THA, right MFGcaud, and right MTG was detected. The correlation between “social skills” and BC of right thalamus survived the conservative FDR correction. The “attention switching” area of AQ was positively correlated with the BC of the left SPC. The “attention to details” area of AQ was positively correlated with the BC of the left SPC, right CNGisthm, and right PUT and negatively correlated with the BC of left POG. The “communication” area of AQ was negatively correlated with the BC of the left IFGoperc. The “imagination” area of AQ was also significantly, although positively, correlated with the BCN of the left IFGoperc: this correlation survived FDR correction. Moreover, “imagination” was positively correlated with the BC of the left SPC and negatively correlated with BC of left SMG, left LOC, bilateral CNGisthm, and right AMY. Age significantly correlated with the BC of left POG and with the left THA.

Table s1, right column, summarizes the significant correlations between BAP traits and brain network measures in fath-ASD.

**Table 1.** Significant correlations between nodal measures extracted from the connectome weighted on the basis on the number of streamlines and psychological measures in children with ASD and in their fathers.

| Children with ASD        |                                                                                                                                                 | Fathers of children with ASD |                                                                                                          |
|--------------------------|-------------------------------------------------------------------------------------------------------------------------------------------------|------------------------------|----------------------------------------------------------------------------------------------------------|
| Local Efficiency (LE)    |                                                                                                                                                 |                              |                                                                                                          |
| Brain region             | Significant interactions                                                                                                                        | Brain region                 | Significant interactions                                                                                 |
| Left PCL                 | ADOS-CSS: B=0.70; F=8.61, p=0.017, $\eta^2=0.489$                                                                                               | Left SFG                     | Att. swi.: B=-0.97; F=9.25, p=0.012, $\eta^2=0.480$                                                      |
| Right PCL                | ADOS-CSS: B=0.78; F=12.75, p=0.006, $\eta^2=0.586^*$                                                                                            | Right SFG                    | Att. swi.: B=-1.01; F=11.46, p=0.007, $\eta^2=0.534^*$<br>Comm.: B=0.86; F=7.07, p=0.024, $\eta^2=0.414$ |
| Left CNGpost             | ADOS-CSS: B=0.66; F=8.05, p=0.02, $\eta^2=0.472$                                                                                                | Left IFGoperc                | Att. swi.: B=-1.03; F=8.53, p=0.015, $\eta^2=0.460$                                                      |
| Right STG                | ADOS-CSS: B=0.70; F=11.75, p=0.008, $\eta^2=0.566^*$<br>Age: B=-0.54; F=6.79, p=0.028, $\eta^2=0.430$                                           | Left IFGorbit                | Att. det.: B=0.59; F=6.86, p=0.026, $\eta^2=0.407$                                                       |
| Left CAU                 | SA: B=1.10; F= 19.66, p=0.004, $\eta^2=0.766^*$<br>GMDS: B=0.67; F=7.98, p=0.03, $\eta^2=0.571$<br>Age: B=0.59; F=7.22, p=0.036, $\eta^2=0.546$ | Left ORBlat                  | Att. swi.: B=-0.98; F=12.17, p=0.006, $\eta^2=0.549$                                                     |
| Right IPC                | SA: B=0.91; F=6.60, p=0.04, $\eta^2=0.524$ ,<br>RRB: B=-0.85, F= 6.24, p=0.045, $\eta^2=0.510$                                                  | Left LOC                     | Att. swi.: B=-0.91; F=6.89, p=0.025, $\eta^2=0.408$                                                      |
| Left HIP                 | SA: B=0.92; F=6.93, p=0.039, $\eta^2=0.536$<br>RRB: B=-0.88; F= 6.84, p=0.04, $\eta^2=0.533$                                                    | Left MFGrostr                | Att. swi.: B=-0.81; F=5.73, p=0.038, $\eta^2=0.364$                                                      |
| Right HIP                | SA: B=0.92; F=7.45, p=0.034, $\eta^2=0.554$                                                                                                     | Right MFGrostr               | Att. swi.: B=-0.98; F=10.30, p=0.009, $\eta^2=0.507$                                                     |
|                          |                                                                                                                                                 | Left POG                     | Att. swi.: B=-0.90; F=6.22, p=0.032, $\eta^2=0.384$                                                      |
|                          |                                                                                                                                                 | Right POG                    | Att. swi.: B=-0.88; F=5.15, p=0.047, $\eta^2=0.340$                                                      |
|                          |                                                                                                                                                 | Left CNGisthm                | Att. swi.: B=-1.09; F=10.11, p=0.01, $\eta^2=0.503$                                                      |
|                          |                                                                                                                                                 | Right CNGisthm               | Att. swi.: B=-1.04; F=8.36, p=0.016, $\eta^2=0.455$                                                      |
|                          |                                                                                                                                                 | Right SMG                    | Att. swi.: B=-0.89; F=6.27, p=0.031, $\eta^2=0.385$                                                      |
|                          |                                                                                                                                                 | Right PCN                    | Att. swi.: B=-0.92; F=7.37, p=0.022, $\eta^2=0.424$                                                      |
|                          |                                                                                                                                                 | Right STG                    | Att. swi.: B=-0.91; F=5.32, p=0.044, $\eta^2=0.384$                                                      |
|                          |                                                                                                                                                 | Right CUN                    | Att. swi.: B=-0.80; F=5.78, p=0.037, $\eta^2=0.384$                                                      |
|                          |                                                                                                                                                 | Right INS                    | Att. swi.: B=-0.91; F=7.08, p=0.024, $\eta^2=0.415$                                                      |
| Cluster coefficient (CC) |                                                                                                                                                 |                              |                                                                                                          |
| Left CNGpost             | ADOS-CSS: B=0.76; F=8.38, p=0.018, $\eta^2=0.482$                                                                                               | Left SFG                     | Att. swi.: B=-1.00; F=8.67, p=0.015, $\eta^2=0.464$                                                      |
| Left CAU                 | SA: B=1.11; F=18.86, p=0.005, $\eta^2=0.554^*$<br>GMDS: B=0.66, F= 7.32, p=0.035, $\eta^2=0.759$                                                | Right SFG                    | Att. swi.: B=-1.10; F=12.61, p=0.005, $\eta^2=0.558^*$<br>Comm.: B=0.87; F=6.84, p=0.024, $\eta^2=0.406$ |
| Left HIP                 | SA: B=0.95; F=8.09, p=0.029, $\eta^2=0.574$<br>RRB: B=-0.91; F= 7.97, p=0.030, $\eta^2=0.571$                                                   | Left IFGoperc                | Att. swi.: B=-1.06; F=9.33, p=0.01, $\eta^2=0.498$                                                       |
| Right HIP                | SA: B=0.96; F=10.77, p=0.017, $\eta^2=0.643$<br>RRB: B=-0.79; F=8.04, p=0.030, $\eta^2=0.573$<br>GMDS: B=0.88; F=10.17, p=0.019, $\eta^2=0.629$ | Left ORBlat                  | Att. swi.: B=-1.02; F=10.02, p=0.01, $\eta^2=0.501$                                                      |
| Right IPC                | SA: B=0.91; F= 6.23, p=0.047, $\eta^2=0.509$                                                                                                    | Left MFGrostr                | Att. swi.: B=-0.91; F=9.13, p=0.013, $\eta^2=0.477$                                                      |
| Right FPO                | SA: B=0.92; F=10.69, p=0.017, $\eta^2=0.641$                                                                                                    | Right MFGrostr               | Att. swi.: B=-1.03; F=13.47, p=0.004, $\eta^2=0.574^*$                                                   |
| Right ITG                | SA: B=0.95; F=14.21, p=0.009, $\eta^2=0.703$<br>GMDS: B=0.59; F=6.11, p=0.048, $\eta^2=0.504$                                                   | Left FPO                     | Att. swi.: B=-0.82; F=5.67, p=0.04, $\eta^2=0.362$                                                       |
|                          |                                                                                                                                                 | Left POG                     | Att. swi.: B=-0.88; F=5.10, p=0.049, $\eta^2=0.334$                                                      |
|                          |                                                                                                                                                 | Left LOC                     | Att. swi.: B=-1.02; F=10.92, p=0.008, $\eta^2=0.522^*$                                                   |
|                          |                                                                                                                                                 | Left CNGisthm                | Att. swi.: B=-1.15; F=11.89, p=0.006, $\eta^2=0.543^*$                                                   |
|                          |                                                                                                                                                 | Right CNGisthm               | Att. swi.: B=-1.04; F=8.36, p=0.015, $\eta^2=0.455$                                                      |
|                          |                                                                                                                                                 | Right SMG                    | Att. swi.: B=-0.94; F=6.16, p=0.030, $\eta^2=0.381$                                                      |
|                          |                                                                                                                                                 | Right PCN                    | Att. swi.: B=-1.00; F=8.91, p=0.014, $\eta^2=0.471$                                                      |
|                          |                                                                                                                                                 | Right STG                    | Att. swi.: B=-1.00; F=6.66, p=0.027, $\eta^2=0.400$                                                      |
|                          |                                                                                                                                                 | Right ITG                    | Att. swi.: B=-0.71; F=5.61, p=0.039, $\eta^2=0.360$                                                      |

|                                    |                                                                                                                                                                                              |                      |                                                                                                                                                                |
|------------------------------------|----------------------------------------------------------------------------------------------------------------------------------------------------------------------------------------------|----------------------|----------------------------------------------------------------------------------------------------------------------------------------------------------------|
|                                    |                                                                                                                                                                                              | Right CUN            | Att. swi.: B=-0.81; F=6.77, p=0.026, $\eta^2=0.404$                                                                                                            |
|                                    |                                                                                                                                                                                              | Right INS            | Att. swi.: B=-0.92; F=6.05, p=0.034, $\eta^2=0.377$                                                                                                            |
|                                    |                                                                                                                                                                                              | Right ACC            | Imm.: B=-0.69; F=7.89, p=0.018, $\eta^2=0.477$<br>Age: B=-0.79; F=7.67, p=0.020, $\eta^2=0.434$                                                                |
| <b>Betweenness centrality (BC)</b> |                                                                                                                                                                                              |                      |                                                                                                                                                                |
| Left IPC                           | ADOS-CSS: B=0.85; F=8.61; p=0.026, $\eta^2=0.589$                                                                                                                                            | Left IFGperc         | Imm.: B=1.00; F=16.76, p=0.002, $\eta^2=0.626^*$<br>Comm: B=-0.97; F=10.02, p=0.010, $\eta^2=0.500$                                                            |
| <b>Left LOC</b>                    | ADOS-CSS: B=-.60; F=9.93, p=0.020, $\eta^2=0.623$<br>SA: B=0.72; F=11.37, p=0.015, $\eta^2=0.655$<br>GMDs: B=-0.64, p=0.019, $\eta^2=0.630$<br>Age: B=0.63; F=10.21, p=0.016, $\eta^2=0.649$ | Left POG             | Soc. skills: B=-0.67; F=6.15, p=0.033, $\eta^2=0.381$<br>Att. det.: B=0.49; F=5.47, p=0.040, $\eta^2=0.353$<br>Age: B=1.14; F=14.46, p=0.003, $\eta^2=0.591^*$ |
| Left MFGcaud                       | SA: B=0.97; F=9.83, p=0.020, $\eta^2=0.621$<br>RRB: B=-0.98; F=12.93, p=0.011, $\eta^2=0.503$                                                                                                | Left SPC             | Att. swi.: B=0.83; F=6.79, p=0.026, $\eta^2=0.404$<br>Att. det.: B=-0.51; F=5.07, p=0.048, $\eta^2=0.336$<br>Imm.: B=0.64; F=5.50, p=0.040, $\eta^2=0.355$     |
| <b>Right MFGcaud</b>               | SA: B=0.97, F=6.66; p=0.04, $\eta^2=0.526$                                                                                                                                                   | Left SMG             | Imm.: B=-0.84; F=8.77, p=0.014, $\eta^2=0.467$                                                                                                                 |
| Left FFG                           | SA: B=0.61; F=9.22, p=0.023, $\eta^2=0.606$<br>RRB: B=-0.48; F=6.07, p=0.049, $\eta^2=0.503$<br>GMDs: B=-0.59; F=9.68, p=0.021, $\eta^2=0.617$<br>Age: B=0.48, p=0.036, $\eta^2=0.548$       | <b>Left LOC</b>      | Imm.: B=-0.80; F=6.41, p=0.030, $\eta^2=0.391$                                                                                                                 |
| <b>Left CNGpost</b>                | SA: B=0.91; F=15.35, p=0.008, $\eta^2=0.719^*$<br>RRB: B=-0.87; F=15.06, p=0.008, $\eta^2=0.683^*$                                                                                           | <b>Right MFGcaud</b> | Soc. skills: B=0.89; F=6.87, p=0.025, $\eta^2=0.408$                                                                                                           |
| Left PCG                           | RRB: B=0.91; F=6.94, p=0.039, $\eta^2=0.536$                                                                                                                                                 | Right MTG            | Soc. skills: B=1.00; F=15.94, p=0.003, $\eta^2=0.615^*$                                                                                                        |
| Right PCG                          | ADOS-CSS: B=0.91; F=14.96, p=0.008, $\eta^2=0.714$<br>SA: B=-0.90; F=6.66, p=0.014, $\eta^2=0.526$                                                                                           | <b>Left CNGisthm</b> | Imm.: B=-0.70; F=5.41, p=0.040, $\eta^2=0.351$                                                                                                                 |
| <b>Left AMY</b>                    | SA: B=-0.89; F=10.41, p=0.018, $\eta^2=0.662$<br>Age: B=-0.75, p=0.020, $\eta^2=0.609$                                                                                                       | Right CNGisthm       | Att. det.: B=0.63; F=7.90, p=0.018, $\eta^2=0.441$<br>Imm.: B=-0.62; F=5.38, p=0.040, $\eta^2=0.350$                                                           |
|                                    |                                                                                                                                                                                              | Right PCN            | Imm.: B=-0.81; F=5.38, p=0.040, $\eta^2=0.350$                                                                                                                 |
|                                    |                                                                                                                                                                                              | Left INS             | Soc. skills: B=-0.81; F=6.45, p=0.029, $\eta^2=0.392$                                                                                                          |
|                                    |                                                                                                                                                                                              | Right INS            | Soc. skills: B=-0.78; F=5.43, p=0.040, $\eta^2=0.352$                                                                                                          |
|                                    |                                                                                                                                                                                              | Left THA             | Soc. skills: B=0.99; F=10.17, p=0.010, $\eta^2=0.504$<br>Age: B=-0.87; F=6.39, p=0.030, $\eta^2=0.390$                                                         |
|                                    |                                                                                                                                                                                              | Right THA            | Soc. skills: B=0.98; F=16.86, p=0.002, $\eta^2=0.628^*$                                                                                                        |
|                                    |                                                                                                                                                                                              | Right PUT            | Att. det.: B=-0.73; F=10.11, p=0.010, $\eta^2=0.503$                                                                                                           |
|                                    |                                                                                                                                                                                              | Right AMY            | Imm.: B=-0.76; F=6.31, p=0.030, $\eta^2=0.387$                                                                                                                 |

\* Significant interaction after false discovery rate correction.

## S2. Data analysis to understand if all the couples showed similar correlations

To understand if all the couples exhibit the same degree of correlation between DTI and clinical measures we performed the following analysis. For the GLM analysis in which significant DTI-clinical association were found we saved residuals, which express the distance between each data point and the regression line, and so it is an indication of the “degree” of correlation. Then we calculate the Pearson’s correlation coefficient between each couple (father-children) of residuals obtained for the same brain regions. For example, we calculated the correlation between residual of the GLM analysis for EL left CNG isthm in fathers and EL left CNG post in children. We expected that if all the couples showed a similar degree of DTI-clinical correlation, the correlation between residuals would be significant.

We obtained the following results:

EL Left CNG (f:isthm, c:post)  $r=0.1$ ,  $p=0.80$

EL right STG  $r=0.72$ ,  $p=0.008^*$

CC FPO (f:left, c:right)  $r=0.03$ ,  $p=0.91$

CC right ITG  $r=0.52$ ,  $p=0.04^*$

CC CNG (f:isthm, c:post)  $r=0.26$ ,  $p=0.33$

BC Left LOC  $r=0.03$ ,  $p=0.91$

BC right MFGcaud  $r=0.19$ ,  $p=0.47$

BC CNG (f: right isthm, c:left post)  $r=0.51$ ,  $p=0.04^*$

BC AMY (f:right, c:left)  $r=0.15$ ,  $p=0.56$

Thus, only for EL Left CNG, CC right ITG and BC CNG we obtained significant correlations meaning that for these measures the couples show a similar degree of DTI-clinical correlation while for the other measures there could be a difference in the extent to which DTI correlates with clinical measures among the different couples. In a future study, with a larger sample, we could better explore the reasons of these differences.



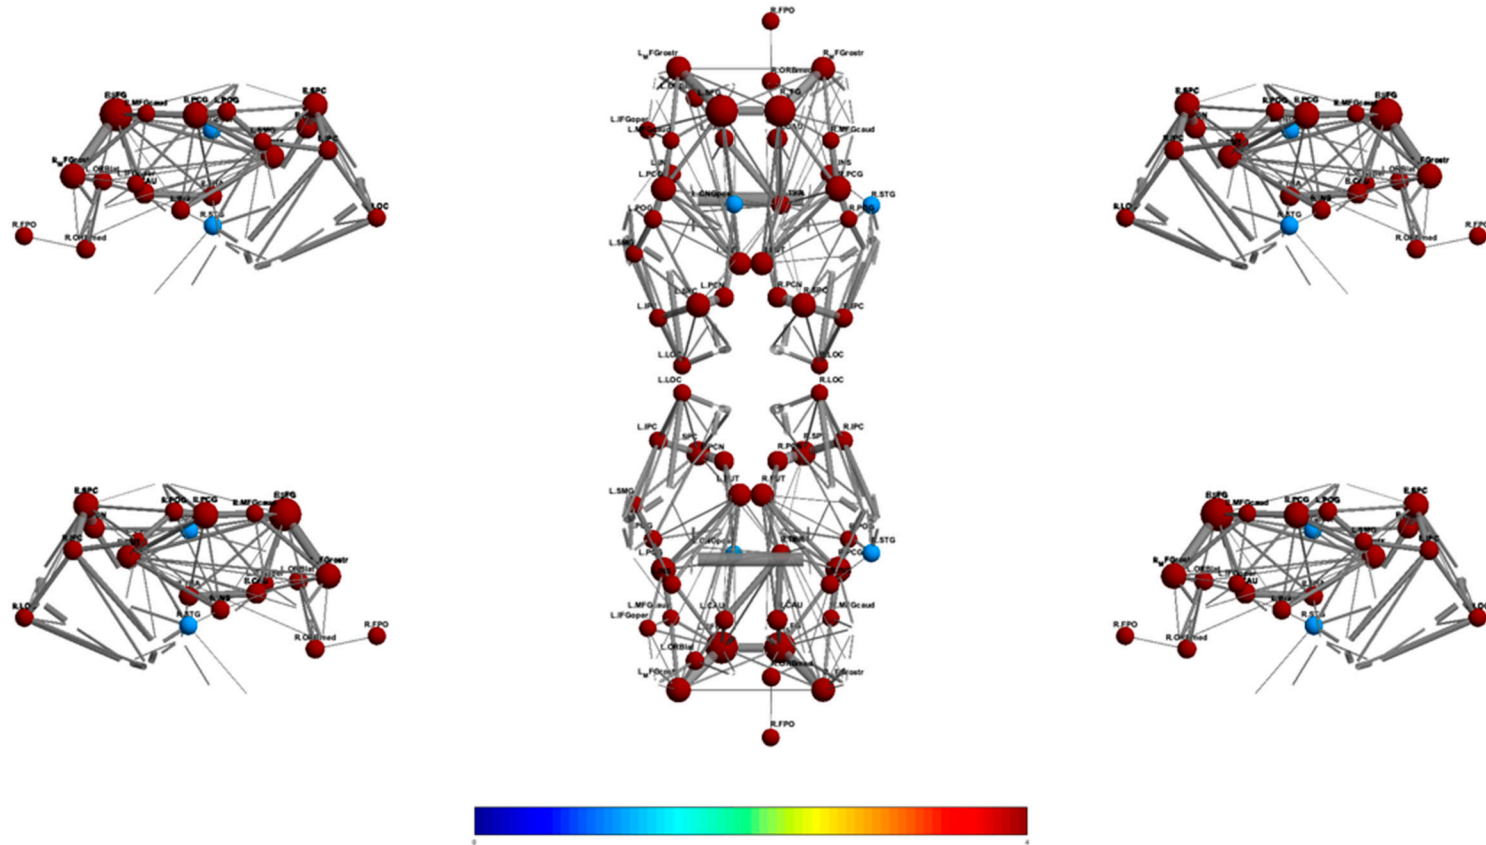

b)

**Figure 1.** Three dimensional sagittal and axial views of the anatomical graph in fathers (a) and in children (b) in which the size of the node represents the Local Efficiency (EL), while the thickness of the edges represents the strength of the connections (number of streamlines). For visualization purpose, only the nodes with an EL value above the threshold of 1.40 and the edges with strength above the threshold of 3500 are represented. In cyan, the nodes for which correlations with clinical measures are shared by fathers and their children.







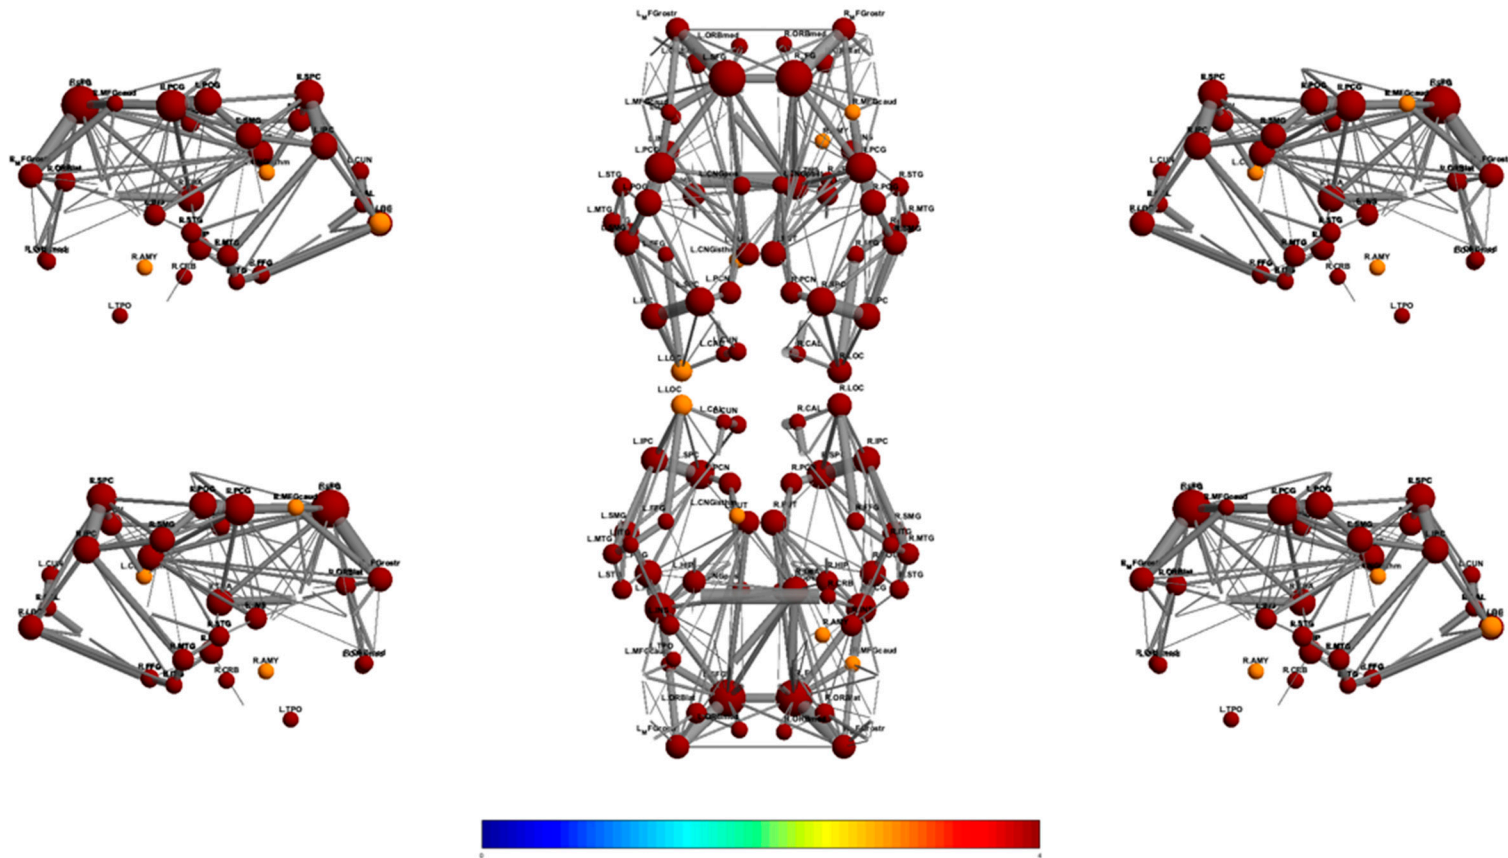

a)

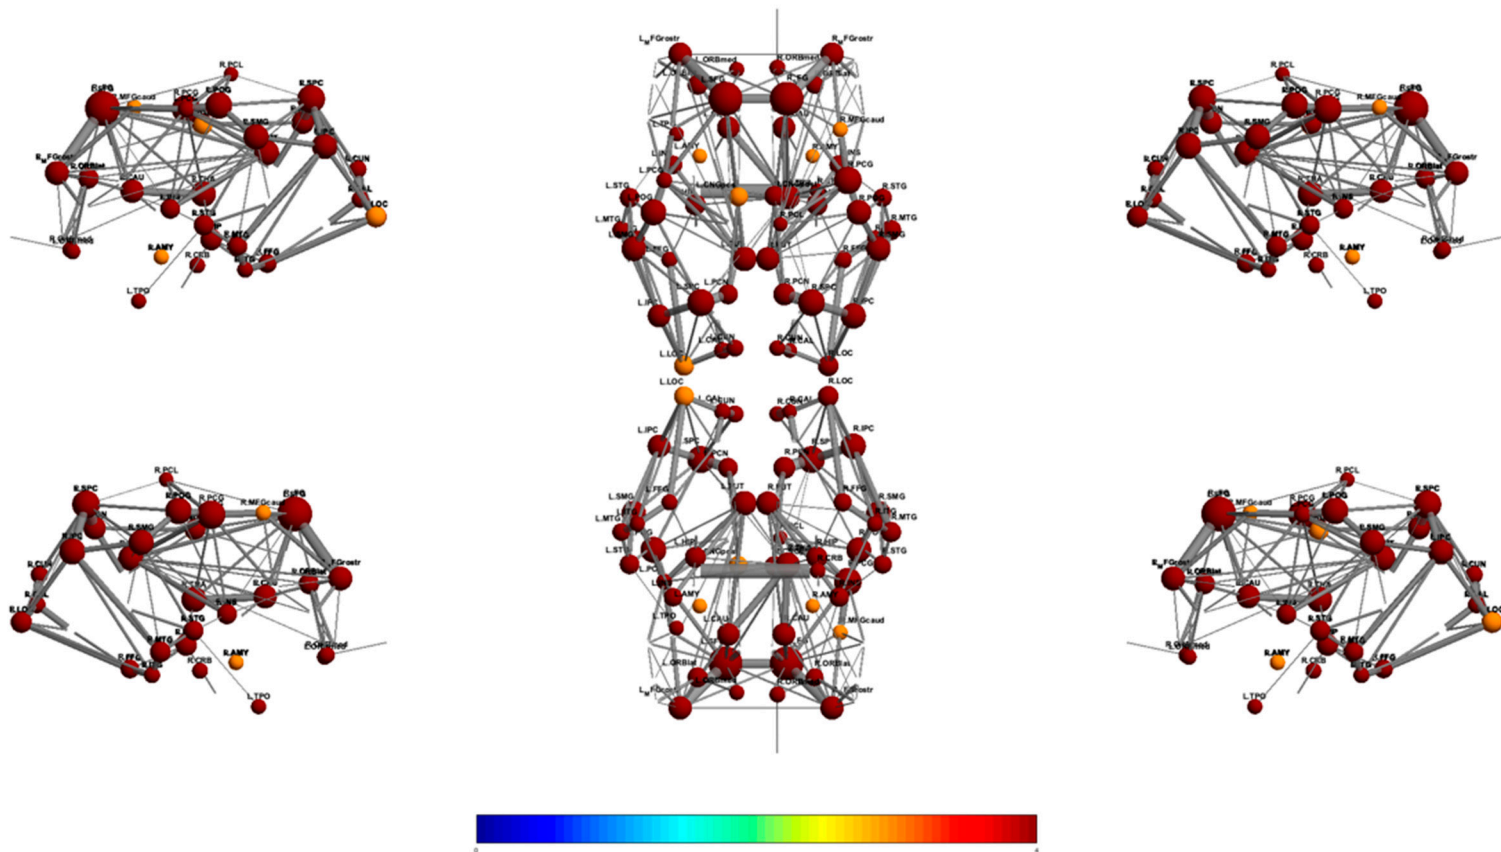

b)

**Figure 8.** Three dimensional sagittal and axial views of the anatomical graph in fathers (a) and in children (b) in which the size of the node represents the Betweenness Centrality (BC), while the thickness of the edges represents the strength of the connections (number of streamlines). For visualization purpose, only the nodes with a BC value above the threshold of 1.0 and the edges with strength above the threshold of 3500 are represented. In orange, the nodes for which correlations with clinical measures are shared by fathers and children.

## Reference

1. Xia, M.; Wang, J.; He, Y. BrainNet Viewer: A Network Visualization Tool for Human Brain Connectomics. *PLoS ONE* **2013**, *8*, e68910.
